# Supplementary material for: Somatostatin receptor 2 expression in nasopharyngeal cancer is induced by Epstein Barr virus infection: impact on prognosis, imaging and therapy
Source: PubMed Central journal article supplement (PMC7785735; doi:10.1038/s41467-020-20308-8), 2021-01-05
Supplement: 41467_2020_20308_MOESM1_ESM.pdf [file 41467_2020_20308_MOESM1_ESM.pdf]

## **Supplementary Information**

**Somatostatin receptor 2 expression in nasopharyngeal cancer is induced by Epstein Barr virus infection: impact on prognosis, imaging and therapy**

## Supplementary Tables:

|                     | N   | %     |
|---------------------|-----|-------|
| Sex                 |     |       |
| Male                | 285 | 70.9  |
| Female              | 111 | 29.1  |
| Total               | 402 | 100.0 |
| Age categorized     |     |       |
| <65                 | 325 | 80.8  |
| ≥65                 | 77  | 19.2  |
| Total               | 402 | 100.0 |
| Type of histology   |     |       |
| WHO type I          | 20  | 5.0   |
| WHO type II         | 75  | 19.0  |
| WHO type III        | 299 | 75.9  |
| Total               | 394 | 100.0 |
| EBV status          |     |       |
| Positive            | 317 | 82.3  |
| Negative            | 68  | 17.7  |
| Total               | 385 | 100.0 |
| Tumor stage         |     |       |
| T1                  | 92  | 25.8  |
| T2                  | 95  | 26.6  |
| T3                  | 75  | 21.0  |
| T4                  | 95  | 26.6  |
| Total               | 357 | 100.0 |
| Nodal stage         |     |       |
| N0                  | 76  | 21.1  |
| N1                  | 99  | 27.4  |
| N2                  | 129 | 35.7  |
| N3                  | 57  | 15.8  |
| Total               | 361 | 100.0 |
| M stage             |     |       |
| M0                  | 296 | 91.6  |
| M1                  | 27  | 8.4   |
| Total               | 323 | 100.0 |
| UICC classification |     |       |
| Stage I             | 15  | 4.7   |
| Stage II            | 67  | 20.9  |
| Stage III           | 108 | 33.8  |
| Stage IVA           | 100 | 31.3  |
| Stage IVB           | 30  | 9.4   |
| Total               | 320 | 100.0 |

**Supplementary Table 1:** Characteristics of the NPC tissue samples investigated in this study. SSTR2 expression was found to be significantly-enriched in EBV-positive NPC (OR=12.7;  $p<0.001$ ), in the non-keratinizing histological subtypes (OR=27.0;  $p<0.001$ ), higher N stage (OR=2.3,  $p=0.003$ ). No correlation was found with sex, T-stage, M-stage and overall UICC-stage.

|          | SSTR2 staining intensity |       |                  |       |            |       |       |       |
|----------|--------------------------|-------|------------------|-------|------------|-------|-------|-------|
|          | Primary                  |       | Local recurrence |       | Metastasis |       | Total |       |
|          | N                        | %     | N                | %     | N          | %     | N     | %     |
| Strong   | 128                      | 41.2  | 30               | 52.6  | 17         | 50.0  | 175   | 43.5  |
| Moderate | 80                       | 25.7  | 8                | 14.0  | 9          | 26.5  | 97    | 24.1  |
| Weak     | 44                       | 14.1  | 6                | 10.5  | 4          | 11.8  | 54    | 13.4  |
| Negative | 59                       | 19.0  | 13               | 22.8  | 4          | 11.8  | 76    | 18.9  |
| Total    | 311                      | 100.0 | 57               | 100.0 | 34         | 100.0 | 402   | 100.0 |

**Supplementary Table 2:** SSTR2 expression (assessed by semi-quantitative IHC scoring) of the NPC tissue samples investigated in this study.

|              | SSTR2 status (n) |          | Total | p-value             |
|--------------|------------------|----------|-------|---------------------|
|              | Positive         | Negative |       |                     |
| London       |                  |          |       |                     |
| EBV positive | 11               | 4        | 15    | 0.52                |
| EBV negative | 1                | 1        | 2     |                     |
| Missing      | 0                | 0        | 0     |                     |
| Total        | 12               | 5        | 17    |                     |
| Innsbruck    |                  |          |       |                     |
| EBV positive | 30               | 0        | 30    | 3.2e <sup>-7</sup>  |
| EBV negative | 5                | 11       | 16    |                     |
| Missing      | 0                | 0        | 0     |                     |
| Total        | 35               | 11       | 46    |                     |
| Utrecht      |                  |          |       |                     |
| EBV positive | 54               | 4        | 58    | 4.9e <sup>-9</sup>  |
| EBV negative | 11               | 21       | 32    |                     |
| Missing      | 2                | 1        | 3     |                     |
| Total        | 67               | 26       | 93    |                     |
| Yogyakarta   |                  |          |       |                     |
| EBV positive | 34               | 4        | 38    | 0.45                |
| EBV negative | 8                | 0        | 8     |                     |
| Missing      | 10               | 0        | 10    |                     |
| Total        | 52               | 4        | 56    |                     |
| Shenzhen     |                  |          |       |                     |
| EBV positive | 26               | 2        | 28    | 0.19                |
| EBV negative | 1                | 1        | 2     |                     |
| Missing      | 0                | 0        | 0     |                     |
| Total        | 27               | 3        | 30    |                     |
| Hong Kong    |                  |          |       |                     |
| EBV positive | 82               | 18       | 100   | NA                  |
| EBV negative | 0                | 0        | 0     |                     |
| Missing      | 4                | 0        | 4     |                     |
| Total        | 86               | 18       | 104   |                     |
| Singapore    |                  |          |       |                     |
| EBV positive | 9                | 3        | 12    | NA                  |
| EBV negative | 0                | 0        | 0     |                     |
| Missing      | 0                | 0        | 0     |                     |
| Total        | 9                | 3        | 12    |                     |
| Stanford     |                  |          |       |                     |
| EBV positive | 34               | 2        | 36    | 0.006               |
| EBV negative | 4                | 4        | 8     |                     |
| Missing      | 0                | 0        | 0     |                     |
| Total        | 38               | 6        | 44    |                     |
| All centers  |                  |          |       |                     |
| EBV positive | 280              | 37       | 317   | 3.9e <sup>-14</sup> |
| EBV negative | 30               | 38       | 68    |                     |
| Missing      | 16               | 1        | 17    |                     |
| Total        | 326              | 76       | 402   |                     |

Note: A subsample was analyzed for the neuroendocrine markers CgA (n=42) and Synaptophysin (n=42) which were negative, and Ki-67 index which was high in these cases (mean 65.13±24.8; n=38), indicating that NPC is a high-grade tumor, behaving differently clinically than neuroendocrine carcinomas (usually low-grade).

**Supplementary Table 3:** Stratification of SSTR2 expression and EBV status by geographic location/different sample sets (Fisher's Exact Test two-sided).

| Covariate | Class            | Estimate  | Std. Error | z     | p        |
|-----------|------------------|-----------|------------|-------|----------|
| Intercept | -                | -3.69     | 1.47       | -2.52 | 0.0117   |
| EBV       | Negative         | REFERENCE |            |       |          |
|           | Positive         | 2.34      | 0.58       | 4.03  | 5.66E-05 |
| Histology | WHO type I       | REFERENCE |            |       |          |
|           | WHO type II      | 1.11      | 0.85       | 1.32  | 0.189    |
|           | WHO type III     | 2.43      | 0.85       | 2.86  | 0.00422  |
| T         | T1-2             | REFERENCE |            |       |          |
|           | T3-4             | -0.37     | 0.38       | -0.97 | 0.33     |
| N         | N0-1             | REFERENCE |            |       |          |
|           | N2-3             | 1.07      | 0.67       | 1.6   | 0.11     |
| M         | M0               | REFERENCE |            |       |          |
|           | M1               | 0.57      | 0.83       | 0.69  | 0.491    |
| Center    | Hong Kong        | REFERENCE |            |       |          |
|           | Innsbruck        | 1.41      | 0.78       | 1.81  | 0.0708   |
|           | London           | -0.17     | 1.15       | -0.15 | 0.882    |
|           | Shenzhen         | 2.58      | 1.32       | 1.96  | 0.0505   |
|           | Singapore        | -1.51     | 0.92       | -1.63 | 0.102    |
|           | Stanford         | 2.27      | 0.86       | 2.65  | 0.00817  |
|           | Utrecht          | 1.03      | 0.74       | 1.39  | 0.164    |
|           | Yogyakarta       | 1.08      | 0.84       | 1.28  | 0.2      |
| Sample    | Primary          | REFERENCE |            |       |          |
|           | Local recurrence | -0.52     | 0.57       | -0.92 | 0.359    |
|           | Metastasis       | 0.3       | 0.73       | 0.41  | 0.682    |
| Age       | -                | 0.01      | 0.02       | 0.65  | 0.516    |
| Sex       | -                | 0.47      | 0.42       | 1.13  | 0.259    |

**Supplementary Table 4:** Multivariate logistic regression model of association between clinical covariates and dichotomised SSTR2 expression (unadjusted two-sided Wald test).

| Patient ID | Stage   | SUVmax |      |      | Biopsy site | SUVmax | IHC score | Radiopeptide |
|------------|---------|--------|------|------|-------------|--------|-----------|--------------|
|            |         | T      | N    | M    |             |        |           |              |
| NPC-002    | T4N3M1  | 18.9   | 16.1 | 15.1 | PNS         | 18.9   | 3         | DOTA-TATE    |
| NPC-007    | T3N3M1  | 10.4   | 12.5 | 7.2  | PNS         | 10.4   | 3         | DOTA-TATE    |
| NPC-008    | T2N2M1  | 8.7    | 9.9  | 1.1  | PNS         | 8.7    | 2         | DOTA-TATE    |
| NPC-013    | T3N2M1  | 4.9    | 7.8  | 14.9 | PNS         | 4.9    | 3         | DOTA-TATE    |
| NPC-017    | T2N2M1  | 6.4    | 7.3  | 12.3 | PNS         | 6.4    | 3         | DOTA-TATE    |
| NPC-019    | rT3N0M0 | 12.2   | -    | -    | PNS         | 12.2   | 3         | DOTA-TATE    |
| NPC-005    | rTON0M1 | -      | 4.1  | 1.5  | Lung        | 1.5    | 0         | DOTA-TATE    |
| NPC-006    | T3N3M0  | 4.9    | 3.4  | -    | PNS         | 4.9    | 1         | DOTA-TATE    |
| NPC-012    | T1N2M0  | 5.4    | 10.0 | -    | PNS         | 5.4    | 0         | DOTA-TATE    |
| NPC-015    | T3N3M1  | 4.3    | 22.1 | 13.8 | Skin        | 1.4    | 1         | DOTA-TATE    |
| NPC-018    | T3N3M1  | 8.1    | 6.5  | 3.7  | PNS         | 8.1    | 1         | DOTA-TATE    |
| NPC-020    | T1N3M1  | 4.0    | 11.1 | 12   | PNS         | 4.0    | 1         | DOTA-TATE    |
| NPC-003    | T4N2M1  | 13.4   | 11.3 | 15.3 | -           | -      | -         | DOTA-TATE    |
| NPC-009    | rT4N1M1 | 2.8    | 3.2  | 7.4  | -           | -      | -         | DOTA-TATE    |
| NPC-014    | T4N3M1  | 9.4    | 4.8  | 10.4 | -           | -      | -         | DOTA-TATE    |

**Supplementary Table 5:** Clinical characteristics and SSTR2 status of NPC patients undergoing  $^{68}\text{Ga}$ -DOTA-peptide PET-CT imaging.

| Application | Name        | Sequence                                                                  |
|-------------|-------------|---------------------------------------------------------------------------|
| PCR         | SSTR2       | F: CTTTCTTGGCTATGCAGGTGG<br>R: GAAGATGCTGGTGAAGTATTG                      |
|             | SSTR2       | F: GCACAAGAGGGTTCGAGGAG<br>R: CATAGCGGAGGATGACATAAATGAC                   |
|             | EBER1       | F: ACGCTGCCCTAGAGGTTTTG<br>R: GCAGAAAGCAGAGTCTGGGA                        |
|             | EBER1 probe | Fam-AGGACGGTGTCTGTGGTTGT-Tamra                                            |
| siRNA       | NFKB1       | siRNA 1: AUAUUUGAAGGUAUGGGCCAUCUGC<br>siRNA 2: UUAUACACGCCUCUGUCAUUCGUGC  |
|             | RelB        | siRNA 1: GAGGACAUUAUCAGUGGUGUUCAGCA<br>siRNA 2: GCGAGGAGCUCUACUUGCUCUGCGA |
|             | p52         | siRNA 1: CCCAGGUCUGGAUGGUAUUUAUUGAA<br>siRNA 2: GAUUUCAAAUUGAACUCCUCCAUUG |
|             | c-Jun       | siRNA 1: GAUGGAAACGACCUUCUAU<br>siRNA 2: GUCAUGAACCACGUUAACA              |
|             | RelA        | siRNA 1: CCCUUUACGUCAUCCCUGA<br>siRNA 2: GGAGUACCCUGAGGCUAUA              |
|             | Bcl3        | siRNA 1: UACAUUUGCGCGUUCACGUUGGCGC<br>siRNA 2: AGCUGCACCAUGCUAAGGCUGUUGU  |

F: forward, R: reverse

**Supplementary Table 6: Overview of PCR primers and siRNA used in this study**

## Supplementary Figures:

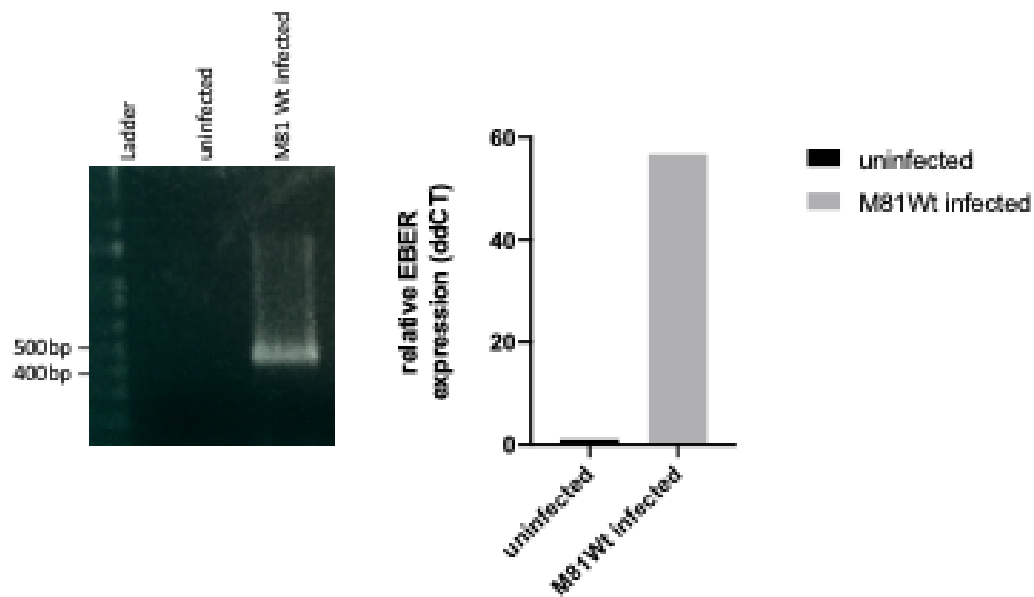

**Supplementary Figure 1:** RT-PCR analysis of EBV-infected primary epithelial cells using EBER-specific primers and PCR with SSTR2-specific primers confirmed EBV infection and induction of SSTR2 transcription in infected epithelial cells. The figure shows the amplification product (425 bp) after PCR of cells infected or not by the virus. The graph shows the EBER expression levels in infected cells relative to uninfected epithelial cells after normalization with GAPDH signals ( $\Delta\Delta CT$ ); Replication n=2;

Supplementary results: Cultured primary cells from normal respiratory epithelium were exposed to cell supernatants containing the epitheliotropic virus EBV M81, leading to infection of 5% of the cells, as previously reported<sup>34</sup>. Three days after exposure to the virus, infected cells were detected with an antibody against the nuclear EBNA1 EBV protein. Approximately one third of the EBNA1-positive cells showed intracellular SSTR2 expression (Figure 2A) whereas all cells treated in parallel with supernatants devoid of virus did not show any evidence of SSTR2 expression. RT-PCR analyses with EBER- and SSTR2-specific probes confirmed the infection and the induction of SSTR2 transcription in infected epithelial cells.



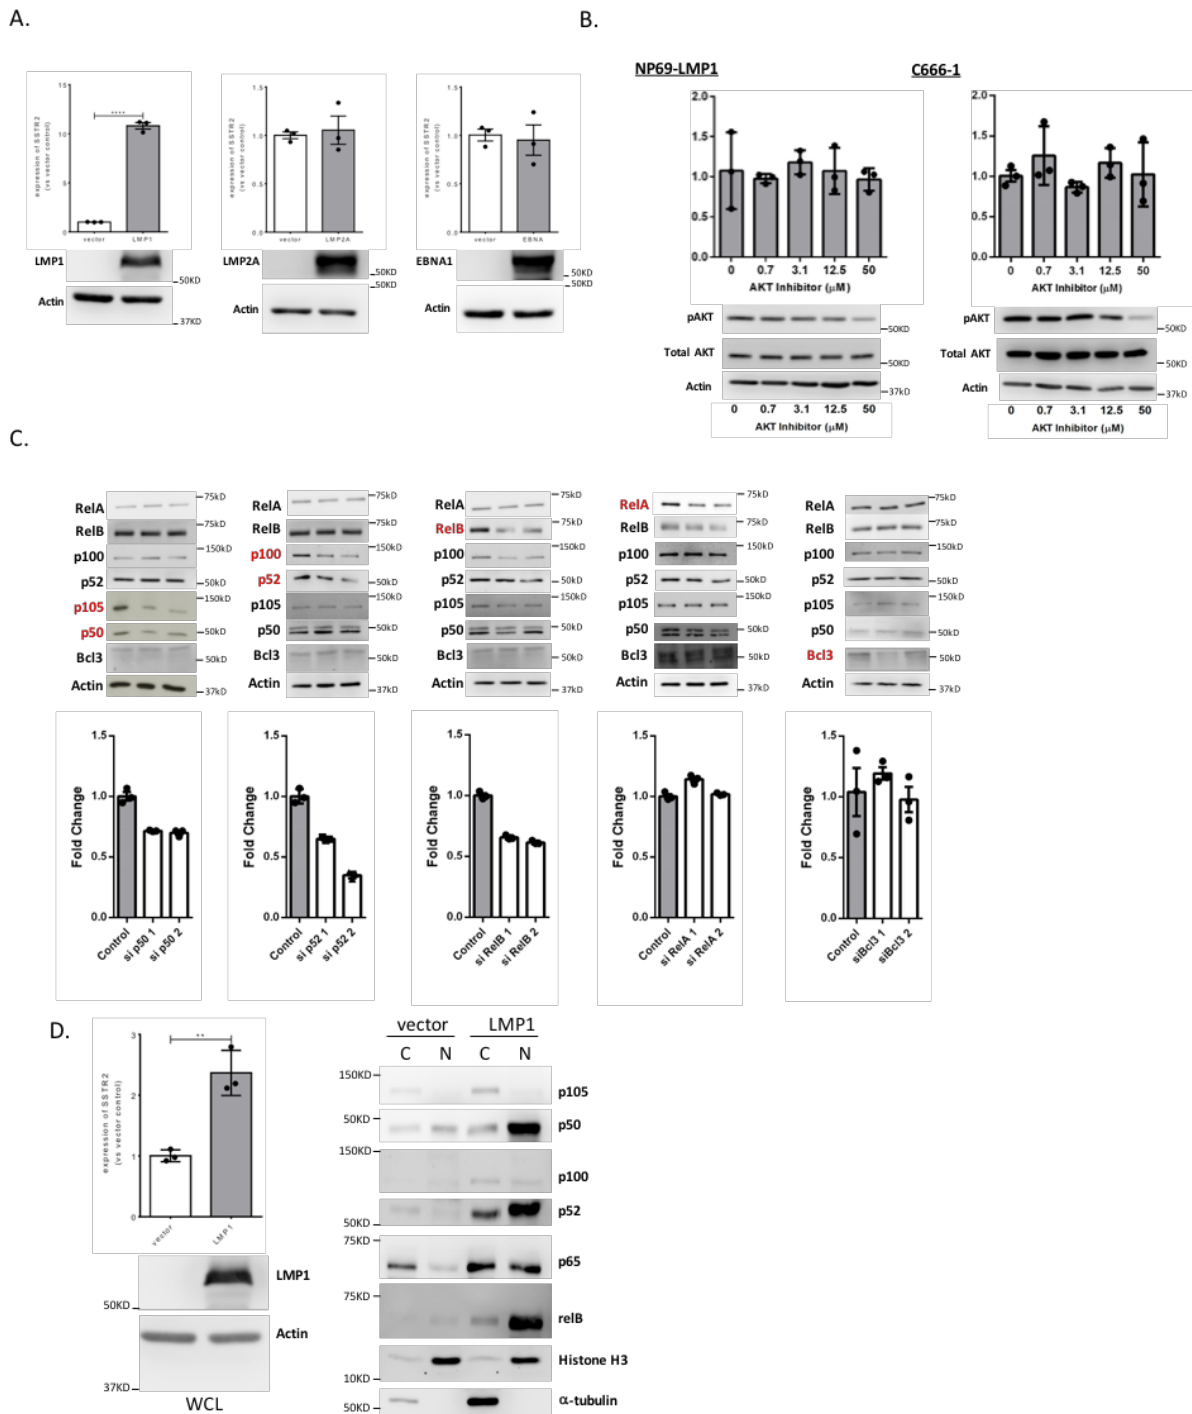

**Supplementary Figure 2:** LMP1 induces SSTR2 expression in EBV-infected nasopharyngeal epithelial cells. (A) Transient transfection of LMP1, but not other EBV latent genes, EBNA1 and LMP2A induces SSTR2 expression in NP69 nasopharyngeal epithelial cells. (B) In LMP1-expressing NP69 and C666-1 cells, SSTR2 expression was not suppressed by AKT inhibitor treatment. (C) siRNAs mediated knockdown of the subunits of activated NF- $\kappa$ B signal complexes, NFKB1 (p105/p50), NFKB2 (p100/p52), RelB, RelA or BCL3 in C666-1 NPC cells. Significant SSTR2 suppression was shown in NPC cells treated with NFKB1, NFKB2 and RelB siRNAs. (D) LMP1 mediates nuclear accumulation of NF- $\kappa$ B subunits and induces SSTR2 expression.



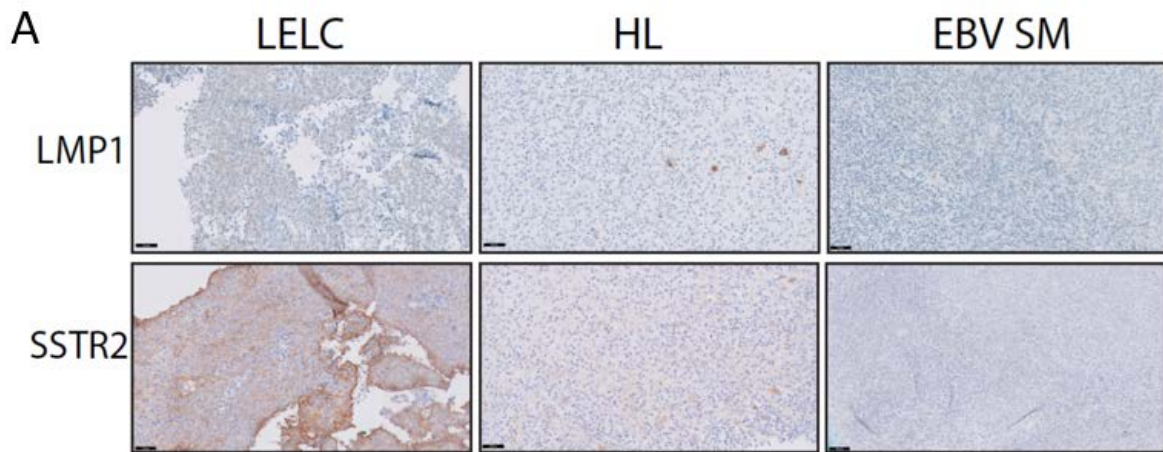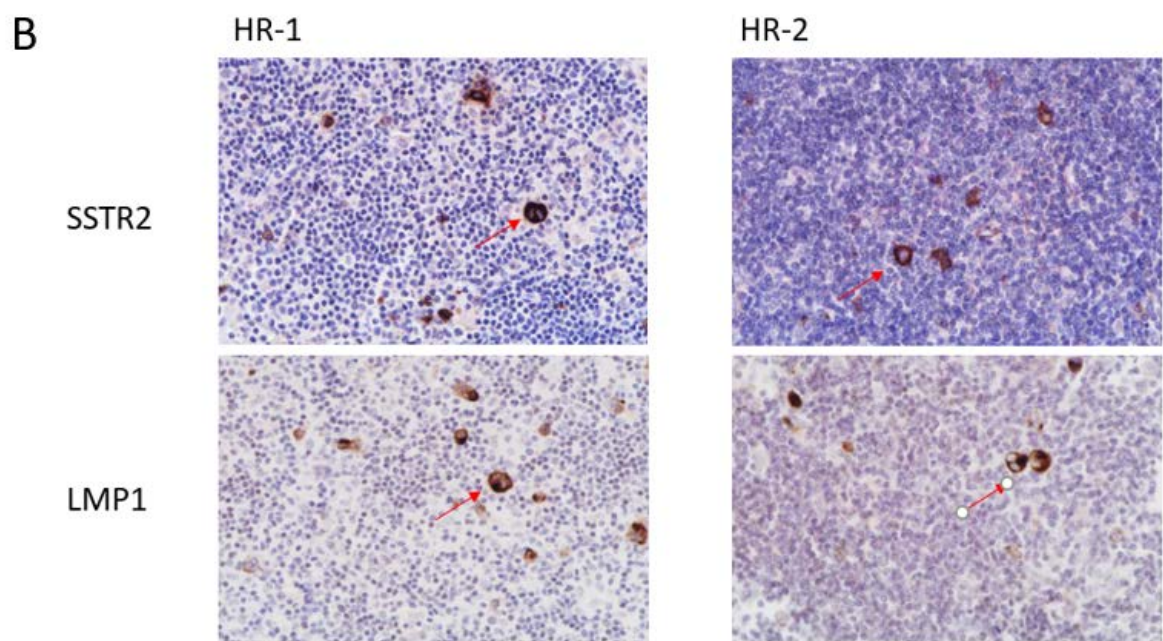

x400

**Supplementary Figure 4:** A) LMP1 and SSTR2 IHC staining (brown) in EBV related tumors. Lymphoepithelioma-like carcinoma of the lung (LELC) shows strong diffuse staining of SSTR2 and LMP1. In EBV-positive Hodgkin's Lymphoma (HL), LMP1 and SSTR2 staining is shown in the malignant EBV-positive Reed-Sternberg cells, surrounded by inflammatory infiltrate. EBV-associated Smooth Muscle tumor (EBV SM) is absent for both LMP1 and SSTR2. B) High-resolution images (x400) of two cases of Hodgkin's Lymphoma (HL) with strong LMP1 and SSTR2 staining shown in the malignant EBV-positive Reed-Sternberg cells.

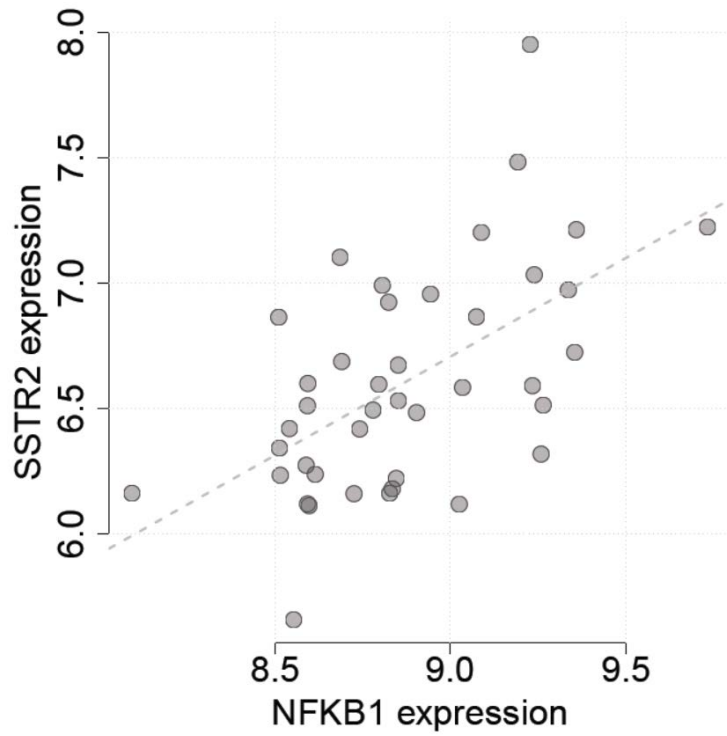

**Supplementary Figure 5:** A) Positive correlation between SSTR2 and NFkB1 expression (linear regression:  $b_1=0.78$ ,  $r^2=0.31$ , two-sided t-test:  $p=0.0001$ ), however, no association between NFkB and LMP1 was found in this dataset (data not shown).

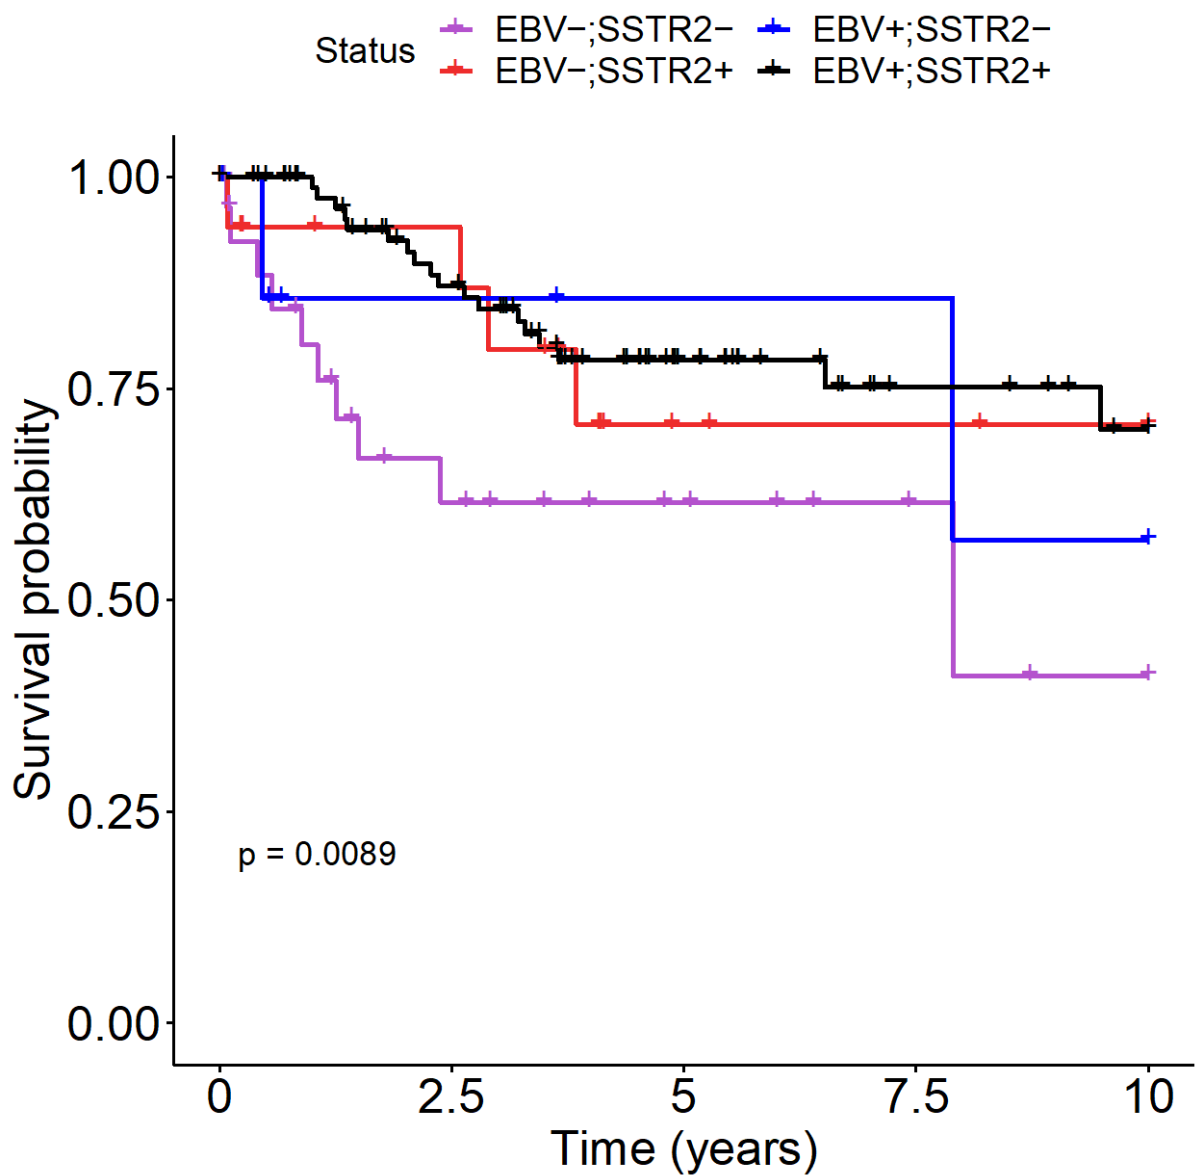

**Supplementary Figure 6:** Kaplan-Meier curves for European center patients jointly classified by their EBV status and SSTR2 status.

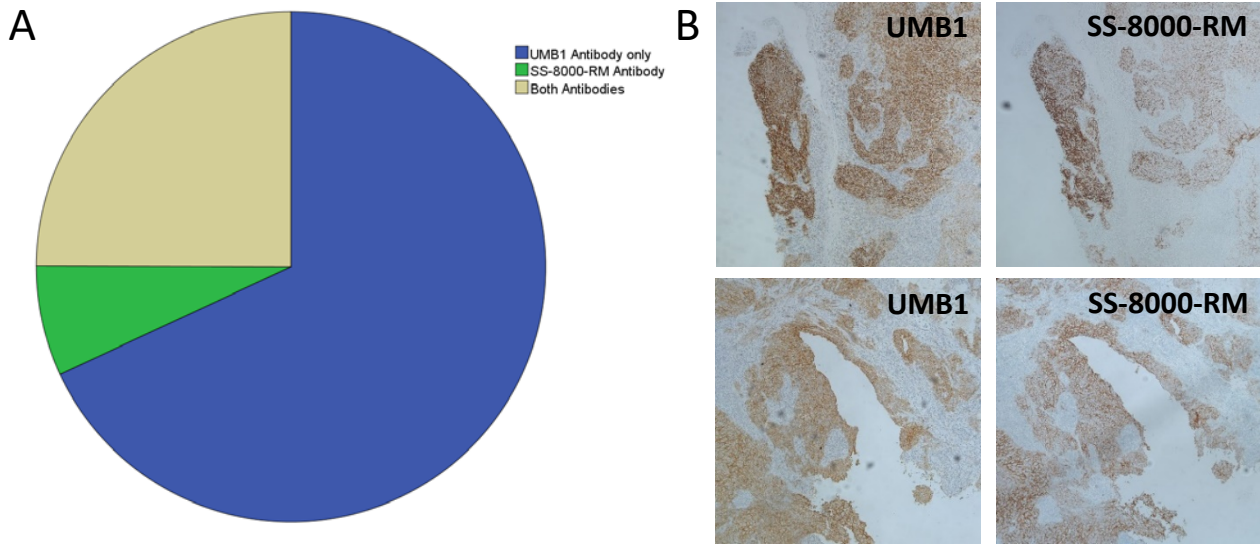

**Supplementary Figure 7: Antibodies used for SSTR2A immunohistochemical staining** A) Showing a piechart of the antibodies used: UMB-1 antibody alone was used in 273 cases (68.1%) while SS-8009-RM antibody alone was used in 28 cases (7 %). Both antibodies were used in 100 cases (24.9%) with a overall moderate inter-rater reliability ( $\kappa=0.49$ ), but a substantial agreement in the 67 cases where tissue samples were available ( $\kappa=0.755$ ). Staining in the TMA (n=33) group showed only a slight agreement ( $\kappa=0.183$ ) B) Showing two exemplary cases where both antibodies were used in tissue samples (left: UMB1, right: SS-8000-RM). Staining was performed one time with each antibody using positive controls.

## Supplementary Notes:

### Supplementary Note 1:

In Figure 3 C three of the tumors in the PEN221 group appear to have an accelerated tumor growth. This is associated with a tumor size above 150 mm<sup>3</sup>. The first injections of vehicle, Ocreotide and PEN-221 occurred when all three groups had an average tumor size of around 150 mm<sup>3</sup>. There were no significant differences in tumor sizes between these groups. Within each group, a few tumors larger than 150mm<sup>3</sup> grew to the humane endpoint quickly, such that none of the treatments, including PEN-221 had any effect on tumor growth or lifespan. When scrutinizing tumors from all three groups, smaller than the 150mm<sup>3</sup> average, at the time of first injection, PEN-221 is the only treatment that slows tumor growth, therefore extending lifespan. To add to this, if you exclude tumors from the data larger than 150 mm<sup>3</sup>, at the time of first injection, there is no significant difference in tumor size between groups, adding strength to the observation that PEN-221 slows tumor growth over time increasing survival. Likewise in tumors larger than 150 mm<sup>3</sup>, there is no significant difference in tumor size between groups at time of first injection with no effect of PEN-221 on tumor growth over time. Therefore PEN-221 only had an effect on tumor growth if the tumor size at the time of first injection was less than the 150 mm<sup>3</sup> average.

### Supplementary Methods:

**SSTR2 staining using UMB1 antibody (Abcam).** Paraffin-embedded biopsy specimens and TMA sections of 4 μm thickness were cut and processed in an automated immunostainer (Roche Ventana, Tucson, Arizona, USA). Slides were heated to 75°C for 8 min and deparaffinized by an EZ prep solution. Following pretreatment of the samples with EDTA at 95°C for 16 min and subsequent addition of peroxidase inhibitor for 4 min, anti-SSTR2 antibody (rabbit monoclonal UMB1-clone (Abcam, Cambridge UK) was manually applied at 1:250 final dilution diluted in Ventana's Antibody Diluent on the sections followed by 60 min incubation at room temperature. The slides were next incubated with Optiview HQ Universal Linker and Optiview HRP multimer (Ventana Medical Systems) for 8 min or with the Universal Secondary Antibody on Ventana Classic machines. The final steps included application of H<sub>2</sub>O<sub>2</sub> and DAB using commercial DAB-containing Ventana kits, and counterstaining with haematoxylin. During each consecutive step of the staining process the slides were rinsed with reaction buffer. Pancreatic tissue was used as a positive control, with liver and lymphoid tissue as negative controls.

**SSTR2 staining using rabbit polyclonal antibodies (BioTrend, Cologne Germany).** Paraffin-embedded biopsy specimens and TMA sections of 4 μm thickness were cut, heated to 75°C for 8 min and deparaffinized by an EZ prep solution. The next steps were pretreating the samples with EDTA at 100°C for 16 min, addition of peroxidase inhibitor for 4 min and manual application of the primary anti-SSTR2 antibody (rabbit polyclonal antibodies (BioTrend, Cologne Germany, code SS-8000-RM) at 1:5 dilution on the sections and incubation for 32 min. The slides were next incubated with Optiview HQ Universal Linker and Optiview HRP multimer (Ventana Medical Systems) for 8 min. The final steps were application of hydrogen peroxide and DAB followed by counterstaining with haematoxylin. During each consecutive step of the staining process the slides were rinsed with reaction buffer. Pancreatic tissue was used as a positive control and liver and lymphoid tissue as negative controls.
